# Supplementary material
Source: PubMed Central journal article supplement (PMC4888439)

Agouti (80 kb)

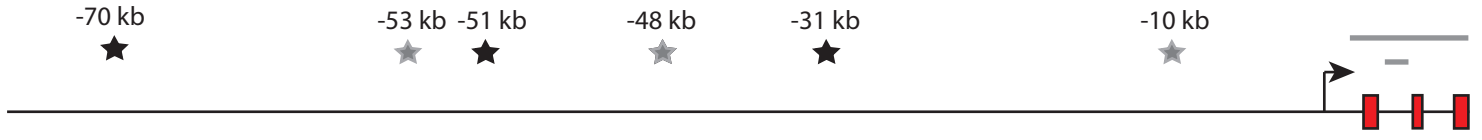

DCT (18.44 kb)

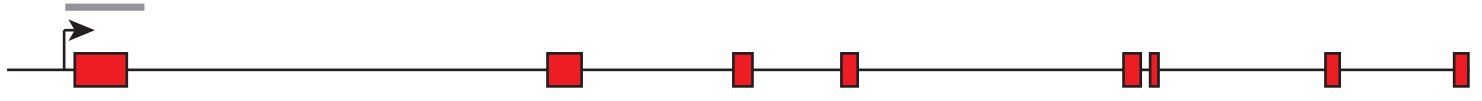

Corin (90.12 kb)

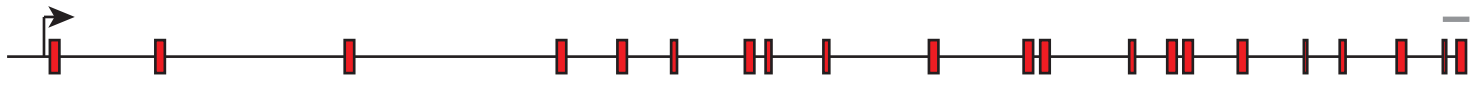

POMC (1.87 kb)

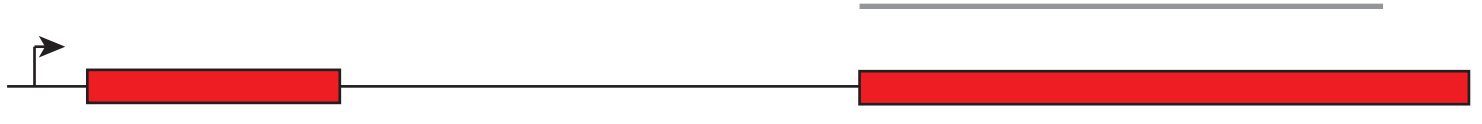

SLC24A5 (7.91 kb)

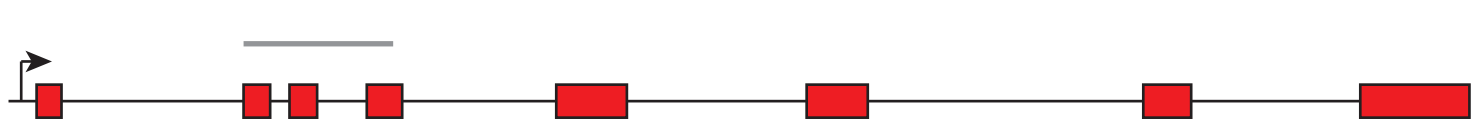

TYR (43.05 kb)

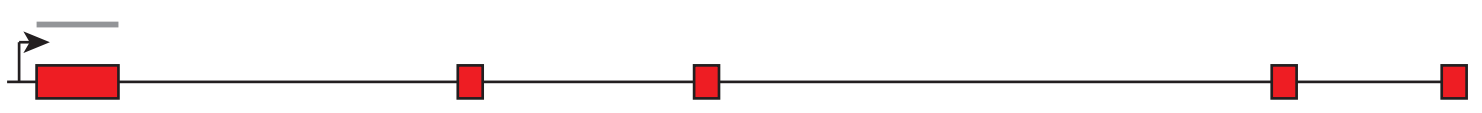

TYRP1 (9.8 kb)

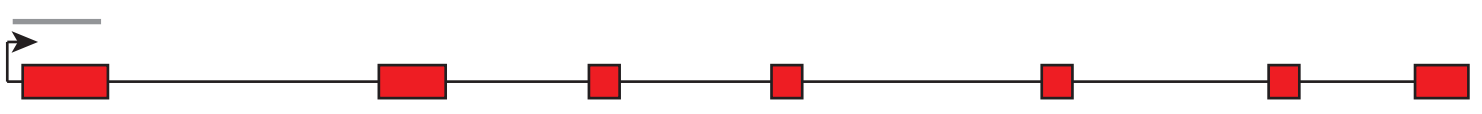

Supplement: supp_esw017_Supp_Fig_1.pdf [file supp_esw017_Supp_Fig_1.pdf]
